# Supplementary material for: A versatile enhanced freeze-substitution protocol for volume electron microscopy
Source: PubMed Central journal article supplement (PMC9393620; doi:10.3389/fcell.2022.933376), 2022-08-08
Supplement: DataSheet1.pdf [file DataSheet1.pdf]

## SUPPLEMENTARY DATA

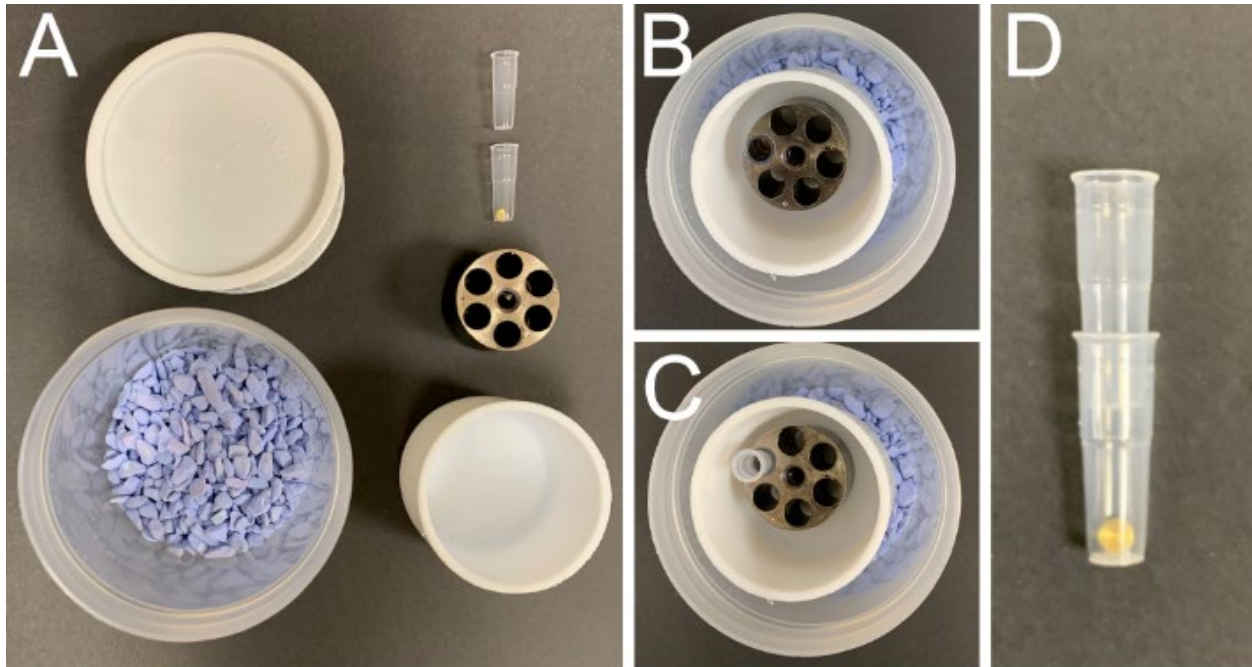

**Supplementary Data 1.** FSaqOTO mPrep capsules and containers used for freeze-substitution of plant materials at room temperature and shown here without reagents. **A.** Top view (start upper left and follow counterclockwise) of specimen cup lid, specimen cup with Drierite™ desiccant, Teflon™ substitution fluid container, mPrep capsule CPD holder, mPrep capsule bottom with HPF planchette (and specimen) inside, and the second mPrep/s capsule used as a top. **B.** Top view of assembled specimen cup with mPrep CPD holder within Teflon™ substitution fluid container in specimen cup. **C.** Same as B, but with a bottom mPrep/s capsule to hold HPF planchette for processing. **D.** Configuration of final mPrep capsule assembly to entrap the sample with HPF planchette (and specimen) between two mPrep/s capsules.

| Sample Preparation Steps |                  |                              |                                      |         |                                              |              |               |             |                  |              |                         |                         |                             |
|--------------------------|------------------|------------------------------|--------------------------------------|---------|----------------------------------------------|--------------|---------------|-------------|------------------|--------------|-------------------------|-------------------------|-----------------------------|
| Sample                   | Freezing Method  | FS Fix                       | FS Solvent                           | Warm-up | Polar Solvent to Aqueous Transition          | Hum Protocol | RFeCN         | TCH         | OsO <sub>4</sub> | Pb aspartate | Uac                     | Dehydration             | Resin                       |
| <i>H. vulgare</i> Root   | Lexes EM Ice HPF | 2% OsO <sub>4</sub>          | 97% acetone + 3% water               | Manual  | to 2% OsO <sub>4</sub> in 0.1M Na cacodylate | Yes          | 2.5% in water | 1% in water | 1% in water      | 50°C         | 1% in water 4°C/50°C    | Acetone/Propylene Oxide | Quetol 651 hard formulation |
| <i>H. vulgare</i> Anther | Lexes EM Ice HPF | 2% OsO <sub>4</sub>          | 97% acetone + 3% water               | Manual  | to 2% OsO <sub>4</sub> in 0.1M Na cacodylate | Yes          | 2.5% in water | 1% in water | 1% in water      | 50°C         | 1% in water 4°C/50°C    | Acetone/Propylene Oxide | Quetol 651 hard formulation |
| <i>C. elegans</i>        | Lexes EM Ice HPF | 1% OsO <sub>4</sub>          | 97% acetone + 3% water               | QFS     | to 2% OsO <sub>4</sub> in 0.1M Na cacodylate | Yes          | 2.5% in water | 1% in water | 1% in water      | 50°C         | 1% in water 4°C/50°C    | Acetone                 | PublBed hard formulation    |
| <i>C. elegans</i>        | Lexes EM Ice HPF | 2% OsO <sub>4</sub>          | 99% acetone + 1% water               | AFS     | None                                         | No           | X             | X           | X                | X            | 1% in acetone room temp | Acetone                 | PublBed hard formulation    |
| <i>S. cerevisiae</i>     | Lexes EM Ice HPF | 1% OsO <sub>4</sub> + 1% UAc | 90% acetone + 5% methanol + 5% water | QFS     | to 2% OsO <sub>4</sub> in 0.1M Na cacodylate | Yes          | 2.5% in water | 1% in water | 1% in water      | 50°C         | 1% in water 4°C/50°C    | Acetone                 | Quetol 651 hard formulation |
| <i>S. cerevisiae</i>     | Lexes EM Ice HPF | 1% OsO <sub>4</sub> + 1% UAc | 99% acetone + 1% water               | AFS     | None                                         | No           | X             | X           | X                | X            |                         | Acetone                 | PublBed hard formulation    |

AFS = Automated Freeze-Substitution, QFS = Quick Freeze-Substitution, RFeCN = potassium ferrocyanide, TCH = thiocarbonylhydrazide, OsO<sub>4</sub> = osmium tetroxide, Pb = lead, UAc = uranyl acetate

## Supplementary Data 2. Sample preparation steps from freeze-substitution to resin.

| Samples and Image Conditions |               |                              |                    |                        |                             |                |                   |             |              |         |                    |
|------------------------------|---------------|------------------------------|--------------------|------------------------|-----------------------------|----------------|-------------------|-------------|--------------|---------|--------------------|
| Figure                       | Sample Type   | Freeze-substitution Protocol | Imaging Platform   | vEM Platform/Mode      | FCC N <sub>2</sub> Settings |                | Z-Resolution      | Image Pixel | Beam         |         |                    |
|                              |               |                              |                    |                        | (%)                         | X-Y resolution | (slice thickness) | Resolution  | Voltage (kV) | Current | Dwell/Image-Time   |
| 2A                           | Barley Root   | Manual FSeqOTO               | ZEISS GeminiSEM300 | Gatan 3-View 2XP w FCC | 10                          | 130nm          | NA                | 3000x4000   | 5            | 1pA     | 3µs                |
| 2B                           | Barley Root   | Manual FSeqOTO               | ZEISS GeminiSEM300 | Gatan 3-View 2XP w FCC | 10                          | 5nm            | 50nm              | 10000x10000 | 5            | 1pA     | 3µs                |
| 2C                           | Barley Root   | Manual FSeqOTO               | ZEISS GeminiSEM300 | Gatan 3-View 2XP w FCC | 10                          | 5nm            | 50nm              | 10000x10000 | 5            | 1pA     | 3µs                |
| 2D                           | Barley Root   | Manual FSeqOTO               | ZEISS GeminiSEM300 | Gatan 3-View 2XP w FCC | 10                          | 5nm            | 50nm              | 10000x10000 | 5            | 1pA     | 3µs                |
| 3A                           | Barley Anther | Manual FSeqOTO               | ZEISS GeminiSEM300 | Gatan 3-View 2XP w FCC | 25                          | 130nm          | NA                | 4000x4000   | 5            | 1pA     | 4µs                |
| 3B                           | Barley Anther | Manual FSeqOTO               | ZEISS GeminiSEM300 | Gatan 3-View 2XP w FCC | 35                          | 5nm            | 50nm              | 10000x10000 | 5            | 1pA     | 3µs                |
| 3C                           | Barley Anther | Manual FSeqOTO               | ZEISS GeminiSEM300 | Gatan 3-View 2XP w FCC | 35                          | 5nm            | 50nm              | 10000x10000 | 5            | 1pA     | 3µs                |
| 3D                           | Barley Anther | Manual FSeqOTO               | ZEISS GeminiSEM300 | Gatan 3-View 2XP w FCC | 35                          | 5nm            | 50nm              | 10000x10000 | 5            | 1pA     | 3µs                |
| 3E                           | Barley Anther | Manual FSeqOTO               | ZEISS GeminiSEM300 | Gatan 3-View 2XP w FCC | 35                          | 5nm            | 50nm              | 10000x10000 | 5            | 1pA     | 3µs                |
| Suppl_Video 1                | Barley Anther | Manual FSeqOTO               | ZEISS GeminiSEM300 | Gatan 3-View 2XP w FCC | 35                          | 5nm            | 50nm              | 10000x10000 | 5            | 1pA     | 3µs                |
| Suppl_Video 2                | Yeast         | QFSaQOTO                     | ZEISS CrossBeam550 | Capella FIBSEM ATLAS 5 | NA                          | 5 nm           | 15nm              | 2661x626    | 1.5          | 1.5µA   | 3µs/1 line average |
| 4A                           | Nematode      | QFSaQOTO                     | ZEISS CrossBeam550 | Brightfield STEM       | NA                          | 10nm           | 70nm              | 2048x2048   | 30           | 600pA   | 3µs/1 line average |
| 4B                           | Nematode      | AFSsolvOTO                   | ZEISS CrossBeam550 | Brightfield STEM       | NA                          | 10nm           | 70nm              | 2048x2048   | 30           | 600pA   | 3µs/1 line average |
| 4C                           | Nematode      | QFSaQOTO                     | ZEISS CrossBeam550 | Brightfield STEM       | NA                          | 3nm            | 70nm              | 2048x2048   | 30           | 600pA   | 3µs/1 line average |
| 4D                           | Nematode      | AFSsolvOTO                   | ZEISS CrossBeam550 | Brightfield STEM       | NA                          | 3nm            | 70nm              | 2048x2048   | 30           | 600pA   | 3µs/1 line average |
| 5A                           | Yeast         | QFSaQOTO                     | ZEISS CrossBeam550 | Brightfield STEM       | NA                          | 10nm           | 70nm              | 2048x2048   | 30           | 600pA   | 3µs/1 line average |
| 5B                           | Yeast         | AFSsolvOTO                   | ZEISS CrossBeam550 | Brightfield STEM       | NA                          | 10nm           | 70nm              | 2048x2048   | 30           | 600pA   | 3µs/1 line average |
| 5C                           | Yeast         | QFSaQOTO                     | Hitachi H7650      | TEM                    | NA                          | 2nm            | 70nm              | 2048x2048   | 80           |         |                    |
| 5D                           | Yeast         | AFSsolvOTO                   | Hitachi H7650      | TEM                    | NA                          | 2nm            | 70nm              | 2048x2048   | 80           |         |                    |

**Supplementary Data 3.** Sample and image conditions table providing major acquisition parameters (SBF-SEM, FIB-SEM, STEM and TEM) for all included images of barley root and anther (*Hordeum vulgare ssp. vulgare*), yeast (*S. cerevisiae*) and nematode (*C. elegans*) samples.

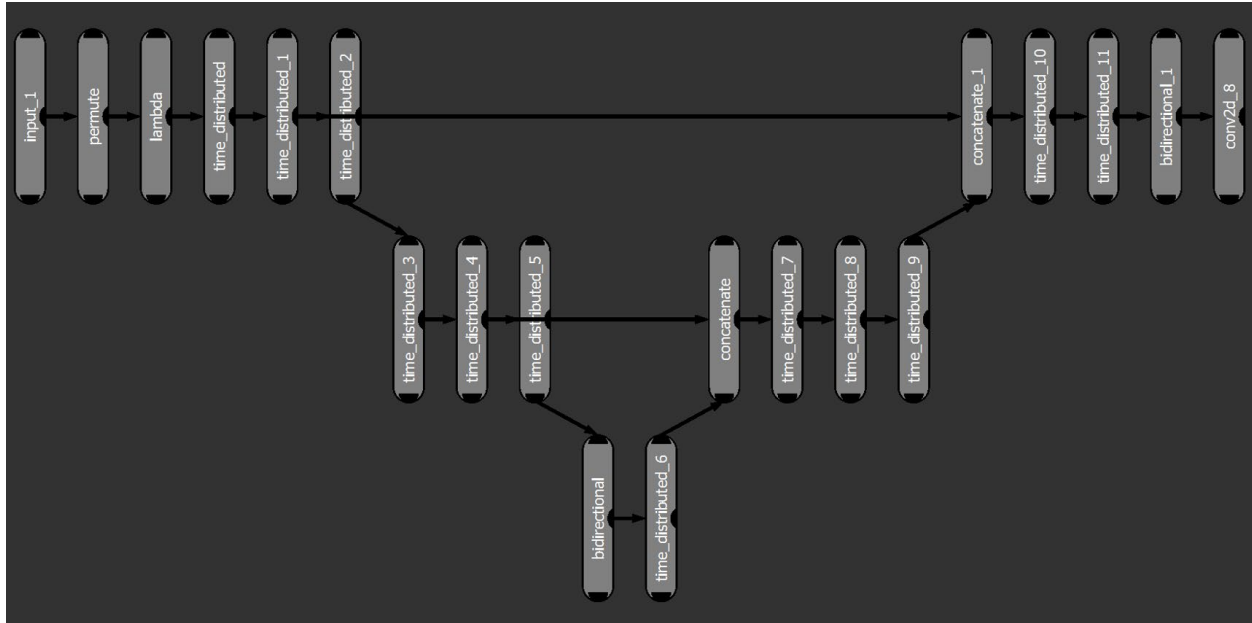

**Supplementary Data 4.** 3D Sensor Deep learning model parameters used with ORS Dragonfly segmentation of barley root (**Fig 2E**).

**Supplementary Data Video 1.** SBF-SEM stack of high-pressure frozen barley root prepared by FSaqOTO.

**Supplementary Data Video 2.** FIB-SEM stack of high-pressure frozen yeast (*S. cerevisiae*) by FSaqOTO.
